# Supplementary material
Source: PubMed Central journal article supplement (PMC5411507)
Supplement: AEM.03472-16_zam999117824s1.pdf [file AEM.03472-16_zam999117824s1.pdf]

CLUSTAL O(1.2.3) multiple sequence alignment

```

                                ↓
UbiX      -----MQSLPASLTGQLFMKRLIVG
Pad1      MLLFPRRTNIAFFKTTGIFANFPLLGRITITTSFSLTHKLSKEVTRASTSPRPKRIVVA
AroY-B    -----MKLIIG
                                ::::.

UbiX      ISGASGAIYGVRLQVLRDVTDIETHLVMSQAARQTLSETDFSLREVQALADVTHDARD
Pad1      ITGATGVALGIRLLQVLKEL-SVETHLVISKWGAATMKYETDWEPHDVAALATKTYSVRD
AroY-B    MTGATGAPLGVALLQALRDMPEVETHLVMSKWAKTTIELETWPWTAREVAALADFSHSPAD
          ::**:*  *:* **.*::: .:*****:*: . *:. ** : ::* *** ::. *

UbiX      IAASISSGSFQTLGMVILPCSIKTLSGIVHSYTDGLLTRAADVVLKERRPLVLCVRETPL
Pad1      VSACISSGSFQHDGMIVVPCSMKSLAAIRIGFTEDLITRAADVSIKENRKLKLLVLTRETPL
AroY-B    QAATISSGSFRTDGMIVIPCSMKTLGIRAGYAEGLVGRAADVVLKEGRKLVLPREMP
          :* *****: **:::***:*:*..* .:::.*: ***** :** * *:* ** **

UbiX      HLGHLRLMTQAAEIGAVIMPPVPAFYHRPQSLDDVINQTVNRVLDQFAITLPEDLFARWQ
Pad1      SSIHLENMLSLCRAGVIFPPVPAFYTRPKSLHDLLEQSVGRILD CFGIH--ADTFPRWE
AroY-B    STIHLENMLLSRMGVAMVPPMPAYYNHPETVDDITNHIVTRVLDQFGLD--YHKARRWN
          ** . * .. * . :.***:**:* :*:::.*: :: * *:* ** *.: . ** :

UbiX      GA-----
Pad1      GIKSK-----
AroY-B    GLRTAEQFAQEIE
          *

```

FIG S1 Sequence alignment of Pad1, AroY-B and UbiX. Asterisks indicate fully conserved amino acid residues, whereas colons indicate residues with strongly similar properties. Protein sequences were derived from *S. cerevisiae* (reference strain S288C) Pad1 (NP\_010827), *K. pneumoniae* AroY-B (AAY57854) and *E. coli* K-12 (AKK15681). The arrow marks the position of the deletion of the first 54 amino acid residues in mutant Pad1<sup>Δ1-54</sup>.
